# Supplementary material for: CCNE1 and E2F1 Partially Suppress G1 Phase Arrest Caused by Spliceostatin A Treatment
Source: MDPI journal article supplement (doi:10.3390/ijms222111623), 2021-10-27
Supplement: s1 [file s1]

## Supplementary Information

### **Cyclin E1 and E2F1 partially suppress G1 phase arrest caused by spliceostatin A treatment**

Kei Kikuchi and Daisuke Kaida\*

Faculty of Medicine, Academic Assembly, University of Toyama, Toyama, 930-0194,  
Japan

\*To whom correspondence should be addressed.

Tel./Fax: +81-76-415-8848

E-mail: [kaida@med.u-toyama.ac.jp](mailto:kaida@med.u-toyama.ac.jp)

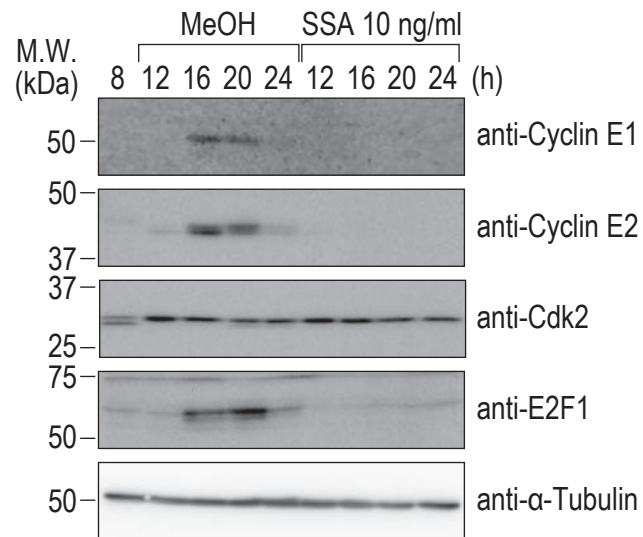

**Figure S1. SSA treatment decreases the protein levels of cell cycle regulators**

Eight hours after release from a double thymidine block, synchronized HeLa S3 cells were treated with MeOH or 10 ng/ml SSA. The cells were then harvested at the indicated time points. The protein levels of cell cycle regulators were analyzed using immunoblotting. Molecular weights are indicated to the left of the gels; antibodies are indicated to the right of the gels. The protein level of  $\alpha$ -tubulin was measured as an internal control.

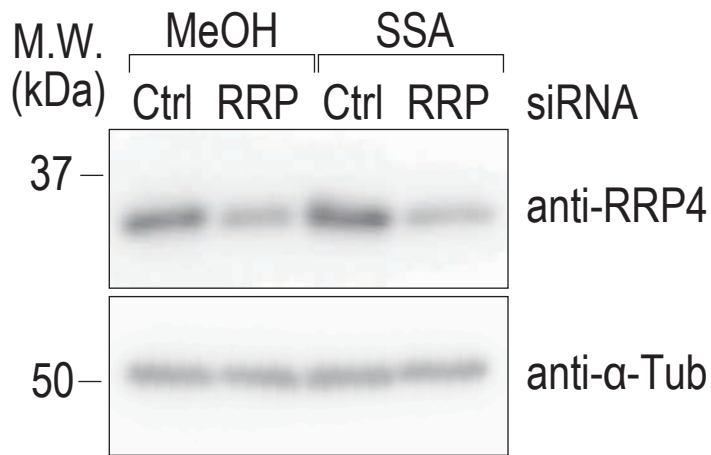

**Figure S2. Confirmation of successful knockdown of *RRP4***

Synchronized cells were released from the first thymidine block and transfected with *RRP4* siRNA (RRP) or control siRNA (Ctrl). Eight hours after release from the second thymidine block, the cells were treated with 10 ng/ml of SSA or MeOH for 4 hours, then analyzed by immunoblotting.

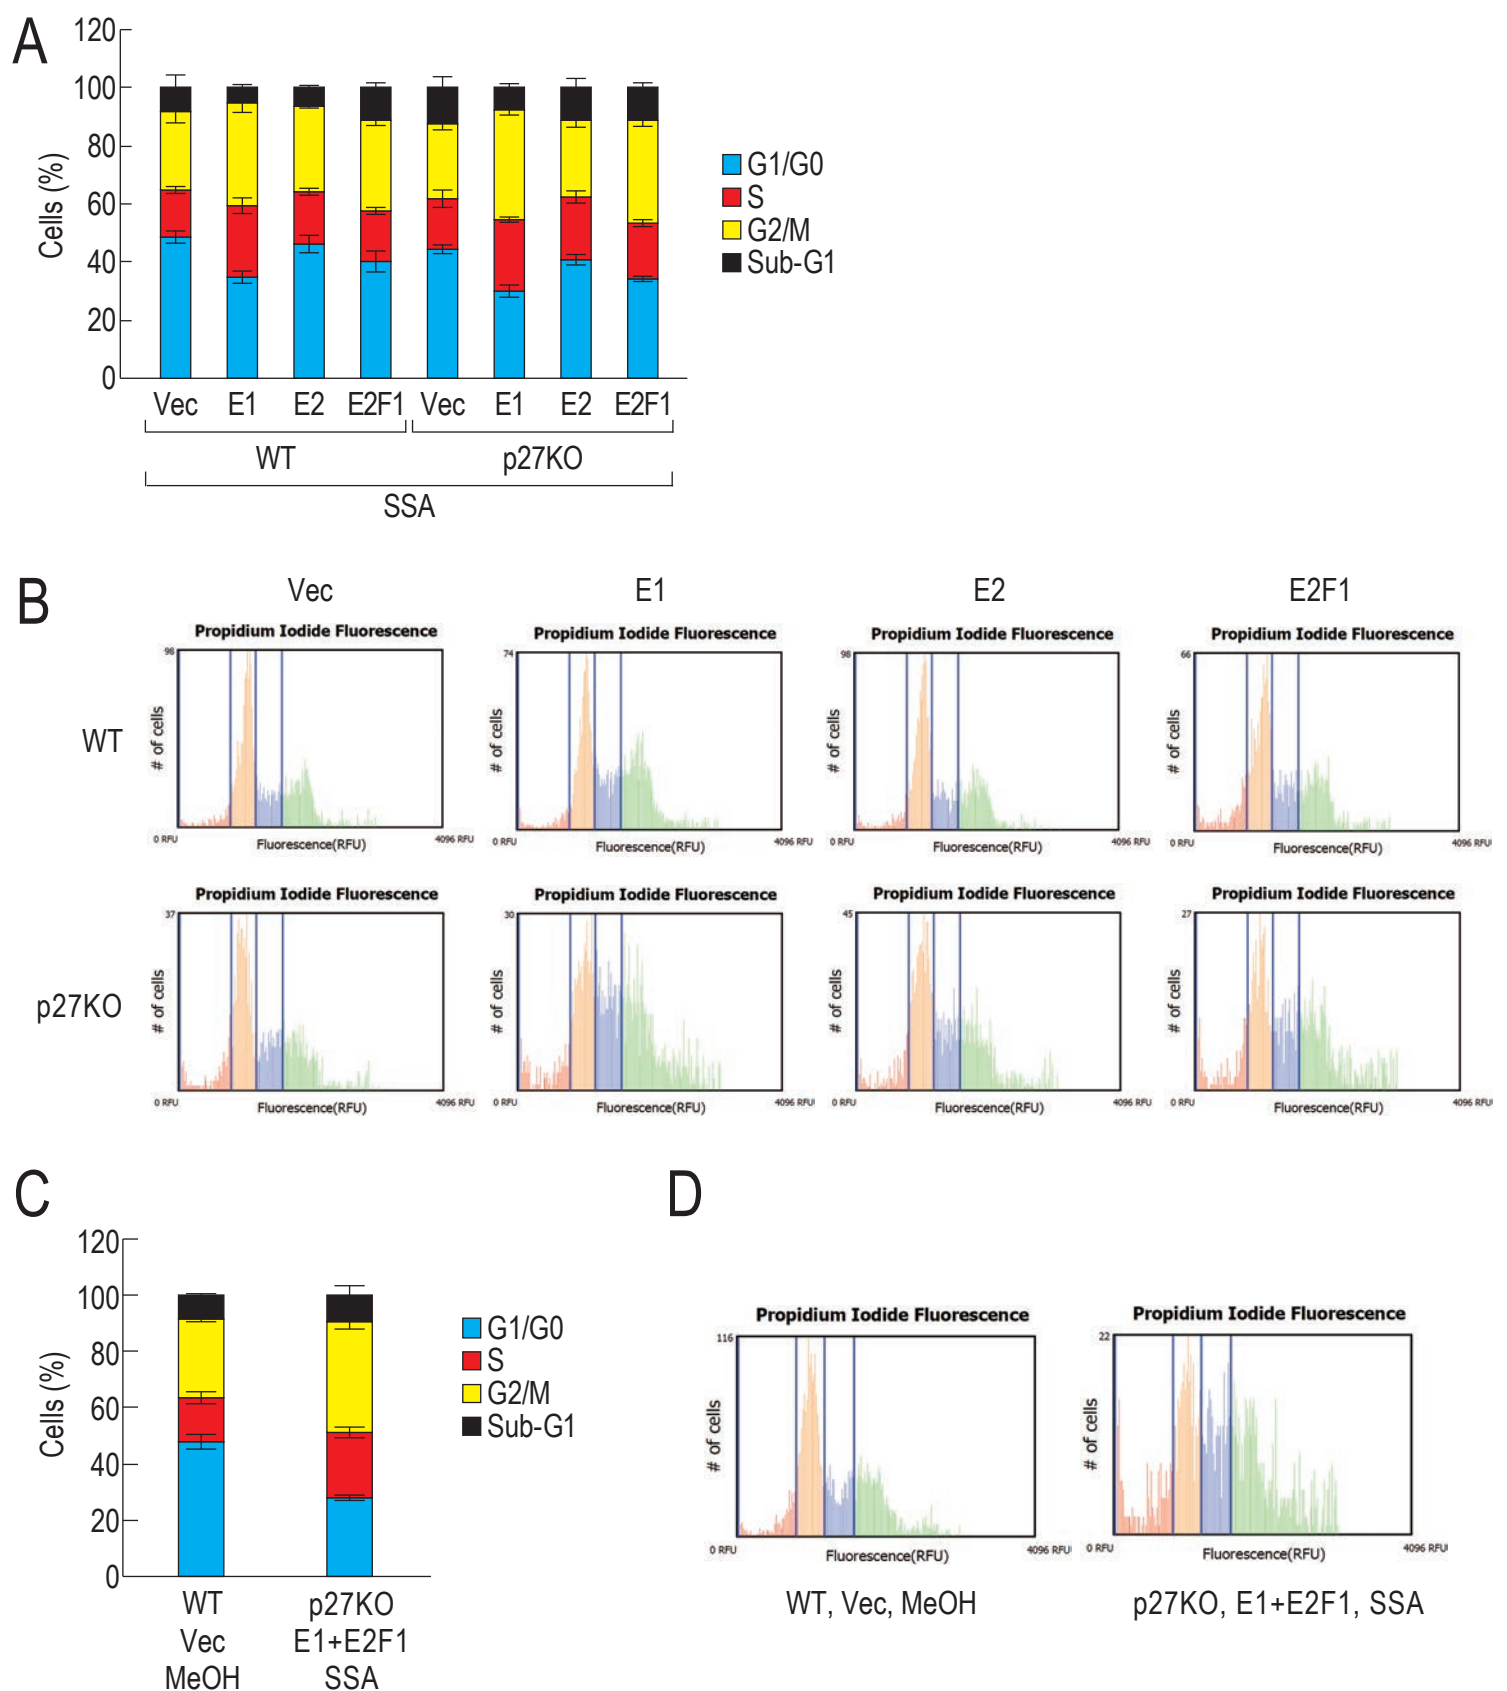

**Figure S3. Overexpression of *CCNE1* and *E2F1* partially suppresses G1 phase arrest caused by splicing inhibition**

(A) HeLa cells or p27 KO cells were transfected with pcDNA3.1-Myc/HIS (Vec), CCNE1-Myc (E1), CCNE2-Myc (E2) or E2F1-Myc (E2F1). The transfected cells were treated with 10 ng/ml of SSA for 24 h. Cell cycle of the cells was analyzed by a cytometer. Error bars indicate standard deviation (n = 3).

(B) Representative histograms from (A).

(C) HeLa cells or p27 KO cells were transfected with pcDNA3.1-Myc/HIS (Vec) or CCNE1-Myc (E1) and E2F1-Myc (E2F1). The transfected cells were treated with 10 ng/ml SSA or MeOH for 24 h. The cell cycle was analyzed using a cytometer. Error bars indicate standard deviation (n = 3).

(D) Representative histograms from (C).

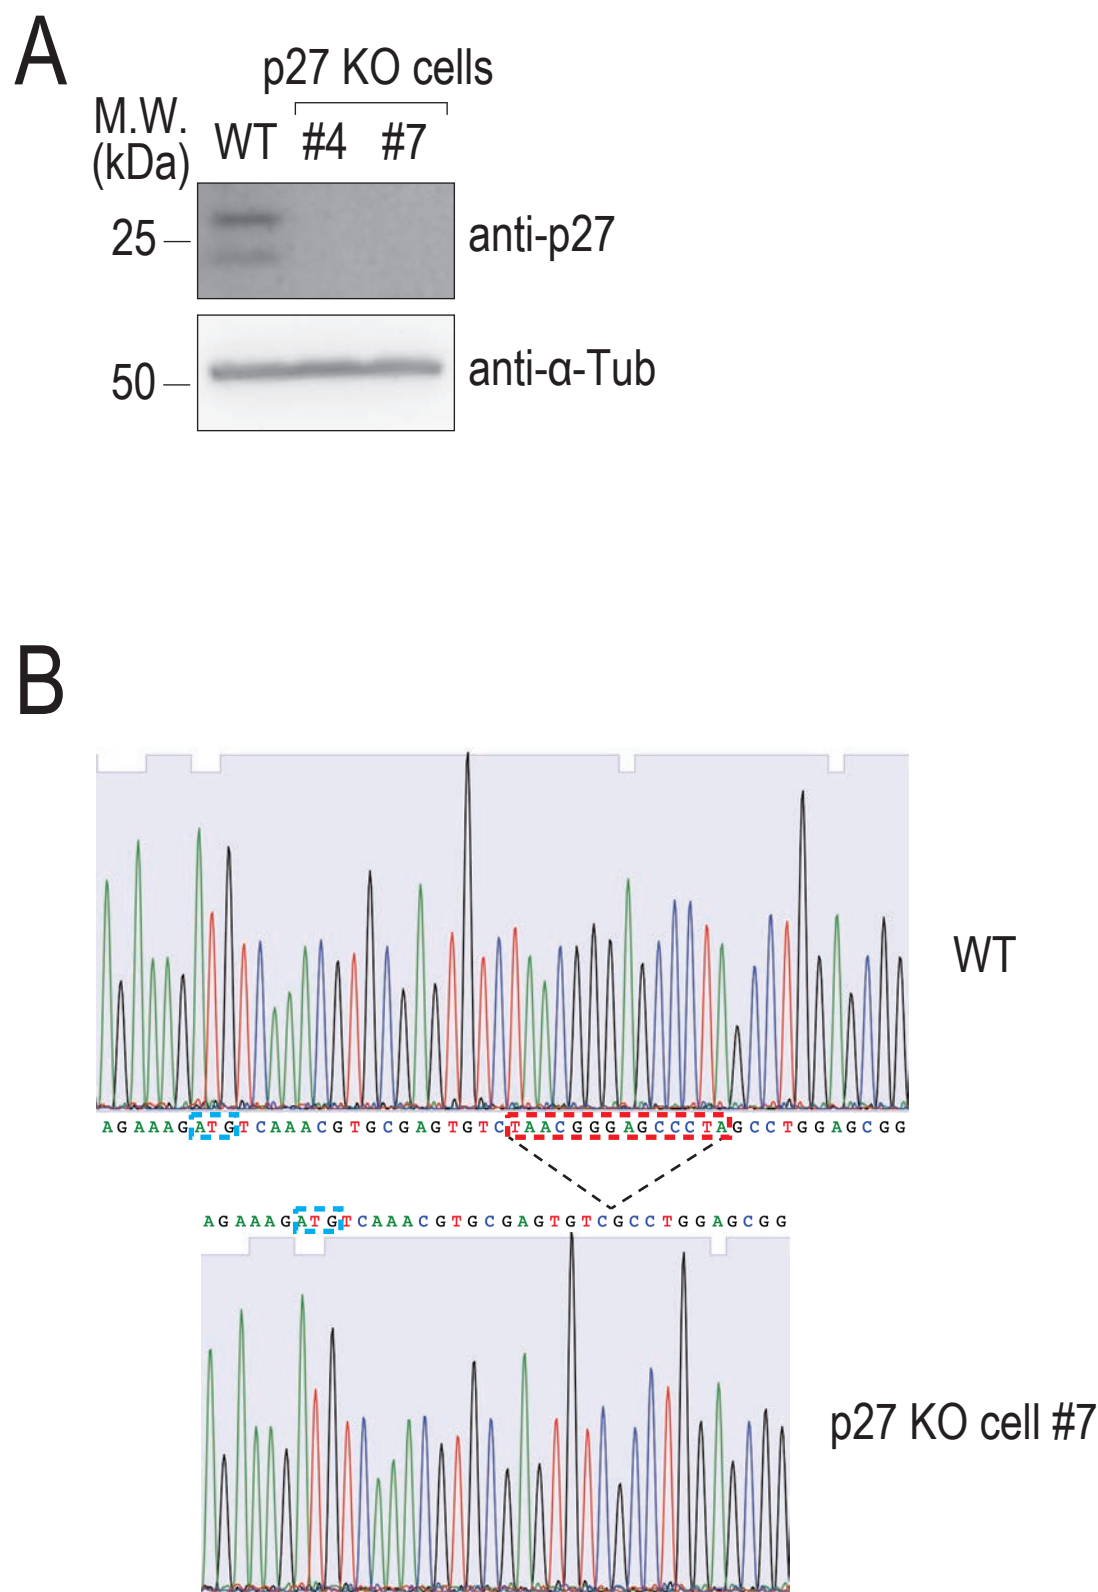

**Figure S4. Confirmation of successful knockout of CDKN1B**

(A) HeLa S3 cells and p27KO cells (clone #4 and #7) were analyzed by immunoblotting.

Molecular weights are indicated to the left of the gels. (B) DNA sequences of HeLa S3 cells and p27KO cells.

Cyan dashed rectangles indicate the start codon. A red dashed rectangle indicates the deleted 13 nt in the p27KO cells.

Table S1. values of samples from Fig. 3B, as calculated using Tukey's test

| Sample1     | Sample2     | p-value   |
|-------------|-------------|-----------|
| WT Vec      | WT CycE1    | 0.0000201 |
| WT Vec      | WT CycE2    | 0.8134967 |
| WT Vec      | WT E2F1     | 0.0028149 |
| WT Vec      | p27KO Vec   | 0.3114226 |
| WT Vec      | p27KO CycE1 | 0.0000003 |
| WT Vec      | p27KO CycE2 | 0.0082047 |
| WT Vec      | p27KO E2F1  | 0.0000083 |
| WT CycE1    | WT CycE2    | 0.0002523 |
| WT CycE1    | WT E2F1     | 0.176808  |
| WT CycE1    | p27KO Vec   | 0.0013917 |
| WT CycE1    | p27KO CycE1 | 0.176808  |
| WT CycE1    | p27KO CycE2 | 0.0675322 |
| WT CycE1    | p27KO E2F1  | 0.9990611 |
| WT CycE2    | WT E2F1     | 0.048043  |
| WT CycE2    | p27KO Vec   | 0.9798145 |
| WT CycE2    | p27KO CycE1 | 0.0000027 |
| WT CycE2    | p27KO CycE2 | 0.1298636 |
| WT CycE2    | p27KO E2F1  | 0.0000947 |
| WT E2F1     | p27KO Vec   | 0.2369103 |
| WT E2F1     | p27KO CycE1 | 0.0009825 |
| WT E2F1     | p27KO CycE2 | 0.9990611 |
| WT E2F1     | p27KO E2F1  | 0.0675322 |
| p27KO Vec   | p27KO CycE1 | 0.0000111 |
| p27KO Vec   | p27KO CycE2 | 0.5010504 |
| p27KO Vec   | p27KO E2F1  | 0.0004944 |
| p27KO CycE1 | p27KO CycE2 | 0.0003526 |
| p27KO CycE1 | p27KO E2F1  | 0.4002237 |
| p27KO CycE2 | p27KO E2F1  | 0.0238961 |

Table S2. List of primers used in this study.

| For cloning                 |                                                             |
|-----------------------------|-------------------------------------------------------------|
| Name                        | Sequence                                                    |
| GFP F-Hind III              | CGCAAGCTTAACATGGTGAGCAAGGGCGA                               |
| GFP ATTTA-R-KpnI            | GCGGTACCTAAATTAAATTAAATTAAATTAAATT<br>TACTTGTACAGCTCGTCCATG |
| CCNE1 pro cloning for MluI  | GCCGCCACGCGTGAATGGACAGGCGGCCAGGAATAG                        |
| CCNE1 pro cloning rev HdIII | GGCGGCAAGCTTCTTCATGGTGTCCCGCTCCTTCG                         |
| CCNE2 pro cloning for MluI  | GCCGCCACGCGTGAAGAGAGGAAGCAAGGGAG                            |
| CCNE2 pro cloning rev HdIII | GGCGGCAAGCTTGTCTAGTTCTCAGCCCTCCC                            |
| E2F1 pro cloning for MluI   | GCCGCCACGCGTCTCGGGCTCAAGCAATCCTC                            |
| E2F1 pro cloning rev HdIII  | GGCGGCAAGCTTCGCGCCAAATCCTTTTTGCC                            |
| CCNE1 cloning for RI        | GCCGCCGAATTCATCATGCCGAGGGAGCG                               |
| CCNE1 cloning rev Xho       | GGCGGCCTCGAGCGCCATTTCCGGCCC                                 |
| CCNE2 cloning for RI        | GCCGCCGAATTCGAGAATGTCAAGACGAAGTAGCCG                        |
| CCNE2 cloning rev Xho       | GGCGGCCTCGAGGTGTTTTCTGGTGGTTTTTCAGTG                        |
| E2F1 cloning for RI         | GCCGCCGAATTCGTCATGGCCTTGGCC                                 |
| E2F1 cloning rev Xba        | GGCGGCTCTAGAGAAATCCAGGGGGGTGAG                              |
|                             |                                                             |
| For RT-qPCR                 |                                                             |
| Name                        | Sequence                                                    |
| 18S rRNA for                | GTTGGTGGAGCGATTTGTCTGGTT                                    |
| 18S rRNA rev                | TATTGCTCAATCTCGGGTGGCTGA                                    |
| CCNE1 Ex3 for               | GAAGGAGCGGGACACCATGAAG                                      |
| CCNE1 Ex3 rev               | GGTCACGTTTGCCTTCCTCTTCC                                     |
| CCNE1 Ex6 for               | GGGCAAATAGAGAGGAAGTCTG                                      |
| CCNE1 Ex6 rev               | AGGGTGTTGCTCAAGAAAGT                                        |
| CCNE1 Ex6-7 for             | CTTGAGCAACACCCTCTTCT                                        |
| CCNE1 Ex6-7 rev             | AAAGGTCTCCCTGTGAAGTTTAT                                     |
| CCNE1 Ex7 for               | GGTATATGGCGACACAAGAAA                                       |
| CCNE1 Ex7 rev               | CTCAAGTTTGGCTGCAATAAAT                                      |
| CCNE2 Ex5 for               | GGGATCAGTCCTTGCATTATCA                                      |
| CCNE2 Ex5 rev               | ATCAGGCAAAGGTGAAGGATTA                                      |
| CCNE2 Ex11 for              | TTGGAGTGGGACAGTATTTTCAG                                     |
| CCNE2 Ex11 rev              | AAGTCTTCAGCTTCACTGGAC                                       |
| CCNE2 Ex11-12 for           | GGCTATGCTGGAGGAAGTAAAT                                      |
| CCNE2 Ex11-12 rev           | GCTCTTCGGTGGTGTCAAT                                         |
| CCNE2 Ex12 for              | CCACCGAAGAGCACTGAAA                                         |
| CCNE2 Ex12 rev              | CAGTGATACCAGTTCTACCCAATC                                    |
| E2F1 Ex3 for                | CGCTATGAGACCTCACTGAATC                                      |
| E2F1 Ex3 rev                | GGACGTTGGTGATGTCATAGAT                                      |
| E2F1 Ex6 for                | TCACTTCTGAGGAGGAGAACA                                       |
| E2F1 Ex6 rev                | TAGAGACTGGCTGGGATCTG                                        |
| E2F1 Ex6-7 for              | GTCACCACCACCATCATCTC                                        |

|                    |                      |
|--------------------|----------------------|
| E2F1 Ex6-7 rev     | ACAACAGCGGTTCTTGCT   |
| E2F1 Ex7 for       | AGGAGTTCATCAGCCTTTCC |
| E2F1 Ex7 rev       | CCCAAAGTCACAGTCGAAGA |
| GFP-2 for          | CTTCTTCAAGTCCGCCATGC |
| GFP-2 rev          | CTTCAGCTCGATGCGGTTC  |
|                    |                      |
| For knockout check |                      |
| Name               | Sequence             |
| p27 KO check F     | CGCTCGCCAGTCCATTT    |
| p27 KO check R     | CATGTCTCTGCAGTGCTTCT |
